# Supplementary material for: RAS–Mitogen-Activated Protein Kinase Signal Is Required for Enhanced PD-L1 Expression in Human Lung Cancers
Source: PubMed Central journal article supplement (PMC5112979; doi:10.1371/journal.pone.0166626), 2016-11-15

**A****NCI-H1975 (Ad; mtEGFR)**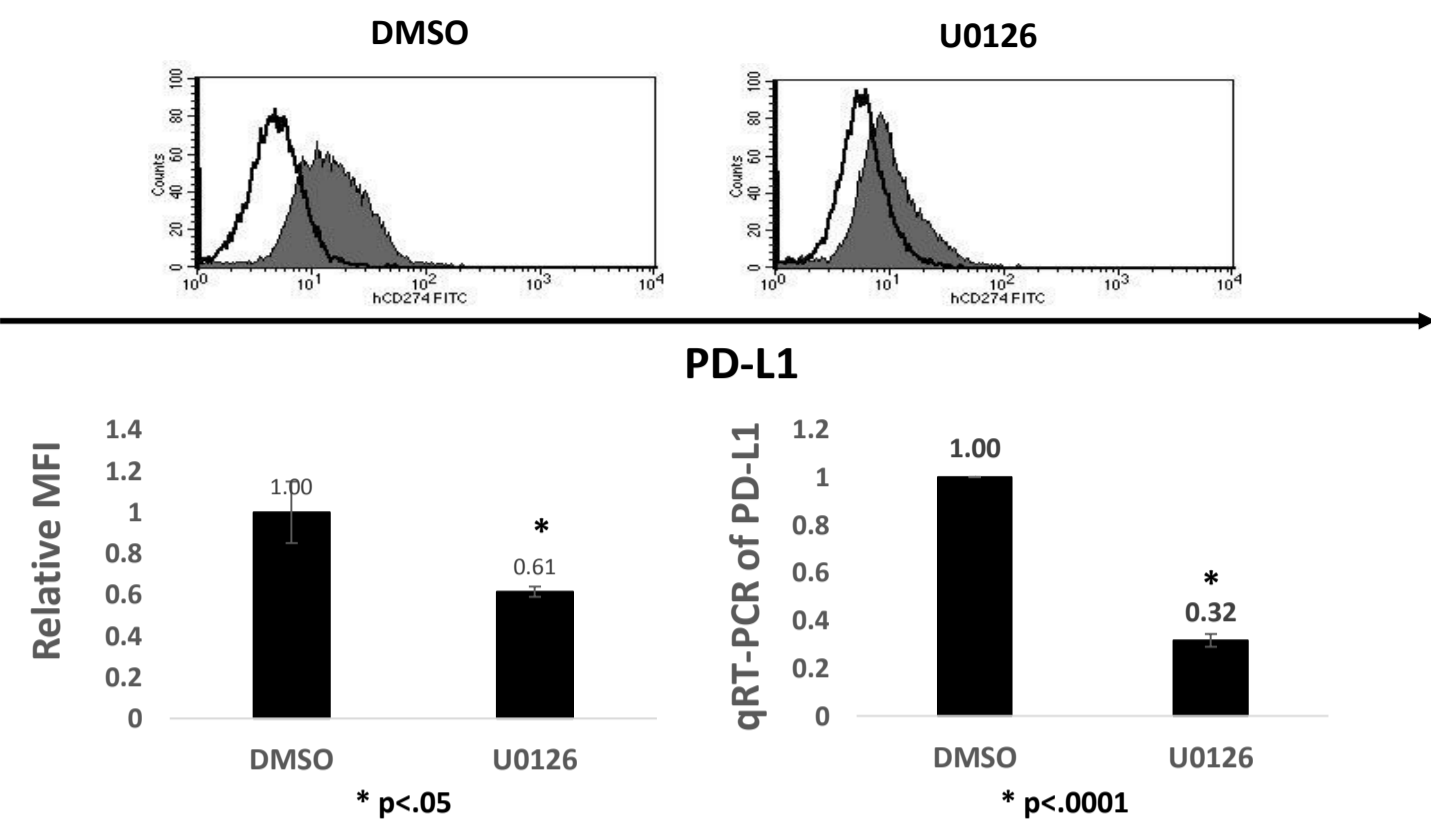**B****EBC-1(Sq)**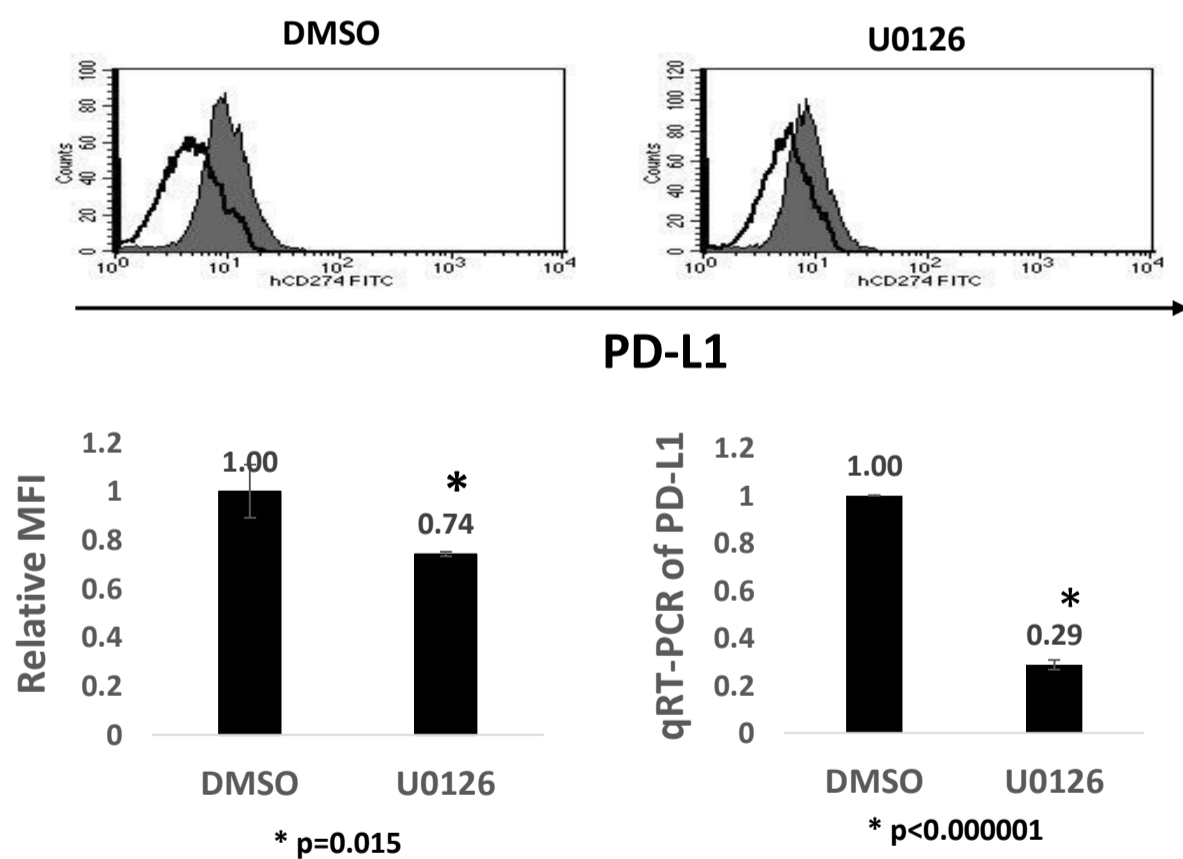**C****NCI-H460 (La)**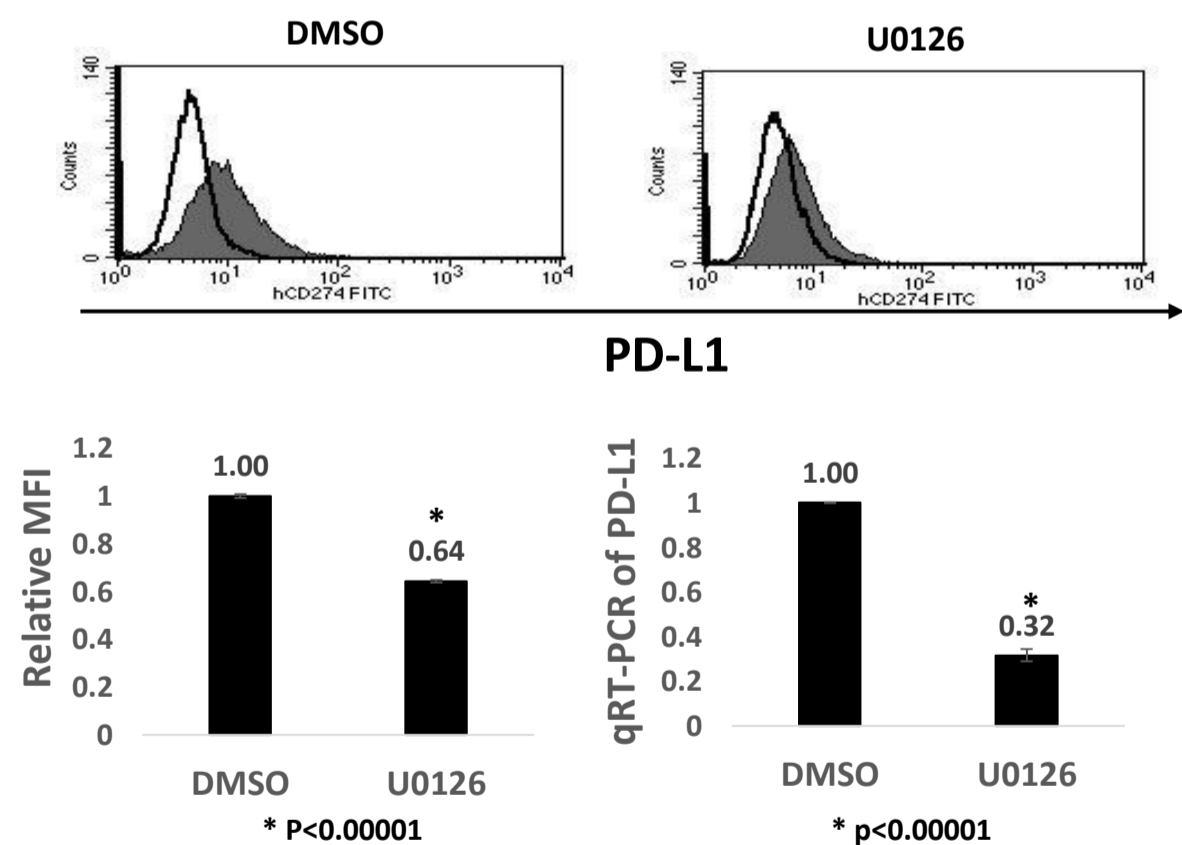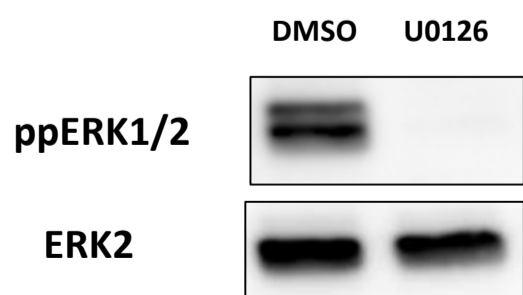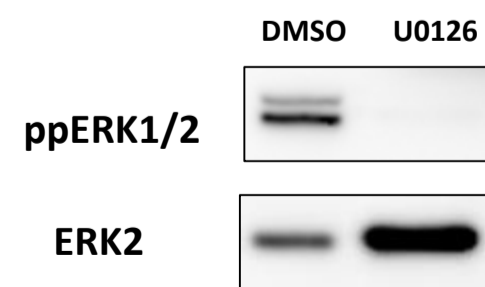

Supplement: pone.0166626.s003.pdf [file pone.0166626.s003.pdf]
