# Supplementary material for: RAS–Mitogen-Activated Protein Kinase Signal Is Required for Enhanced PD-L1 Expression in Human Lung Cancers
Source: PubMed Central journal article supplement (PMC5112979; doi:10.1371/journal.pone.0166626), 2016-11-15

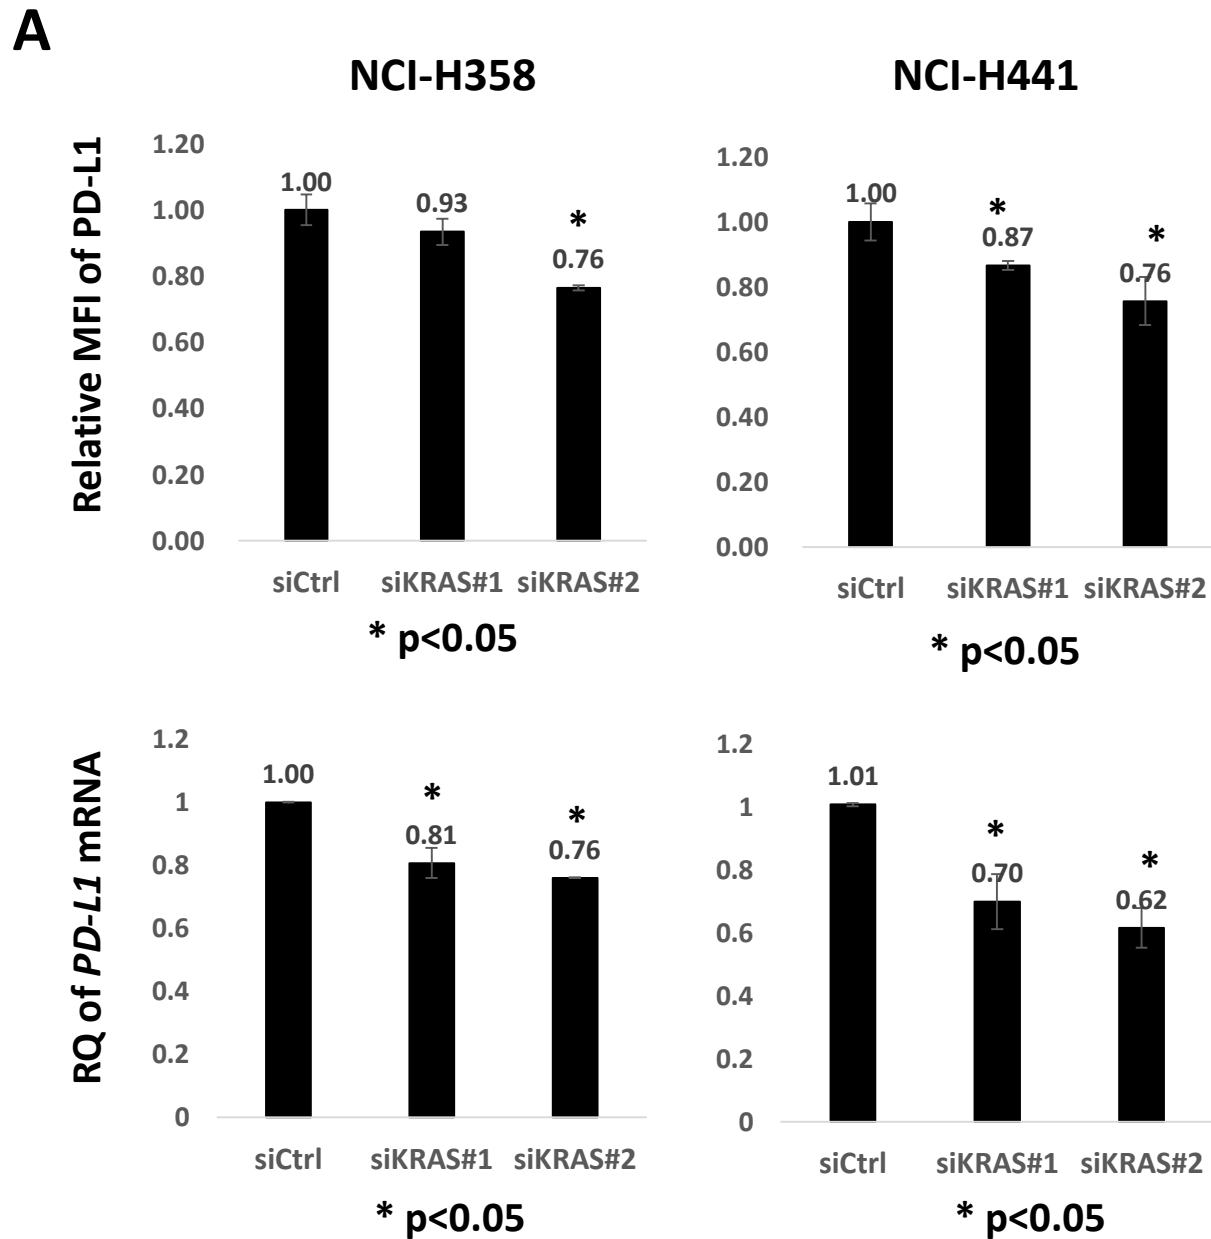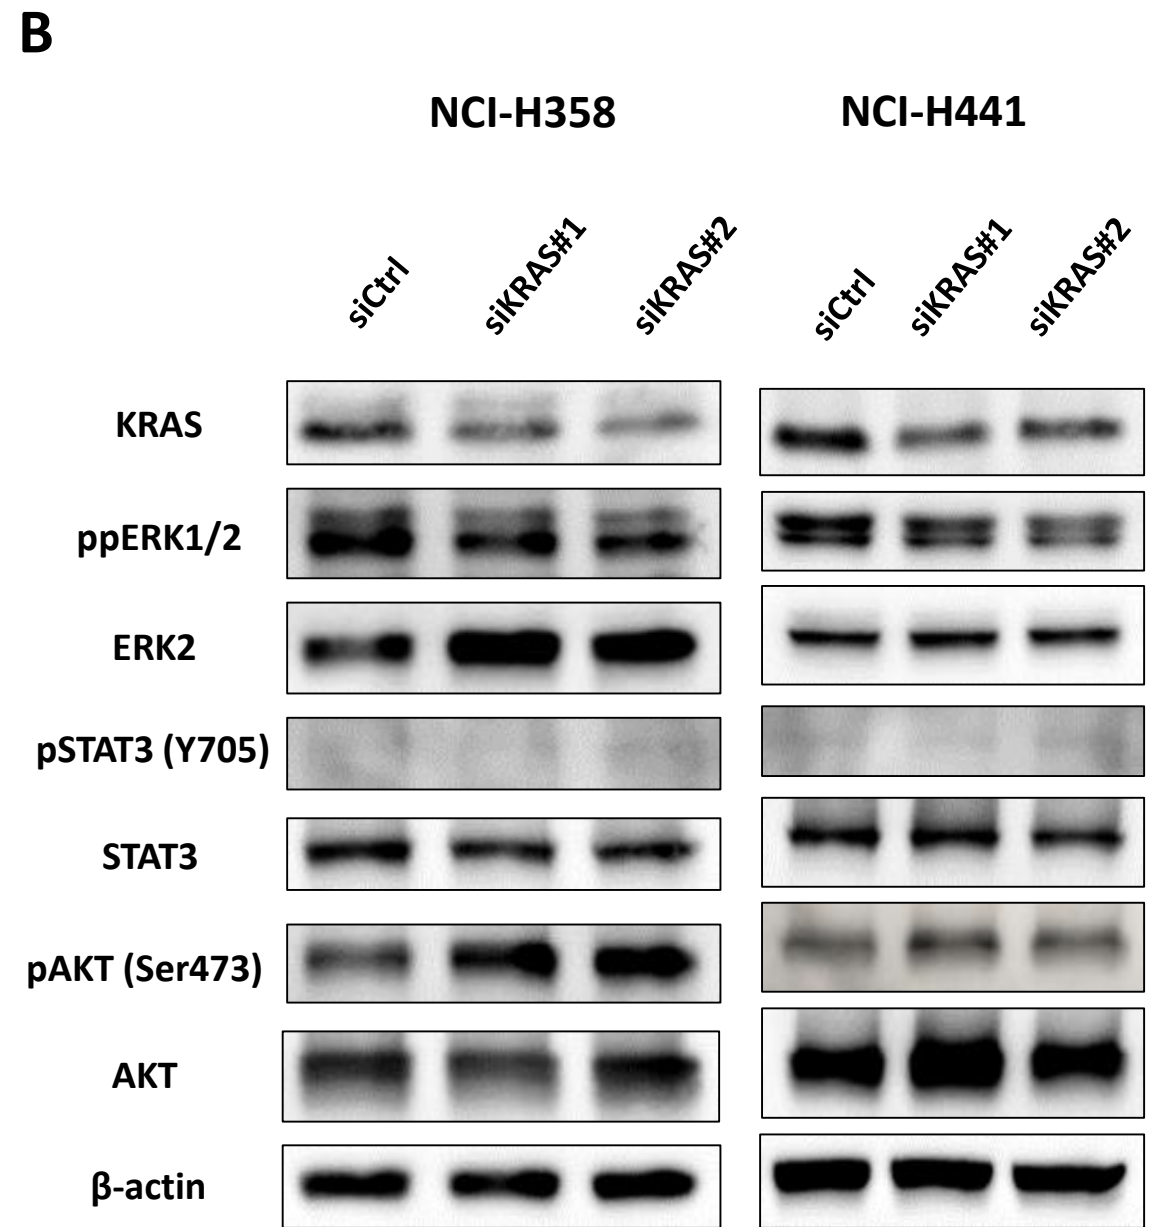

Supplement: pone.0166626.s004.pdf [file pone.0166626.s004.pdf]
