# Supplementary material for: RAS–Mitogen-Activated Protein Kinase Signal Is Required for Enhanced PD-L1 Expression in Human Lung Cancers
Source: PubMed Central journal article supplement (PMC5112979; doi:10.1371/journal.pone.0166626), 2016-11-15
Supplement: pone.0166626.s005.pdf [file pone.0166626.s005.pdf]

**PD-L1-low**

**PD-L1-high**

|               |       |  |
|---------------|-------|--|
| NCIH1650 LUNG |       |  |
| EBC1 LUNG     |       |  |
| NCIH1975 LUNG |       |  |
| NCIH1373 LUNG |       |  |
| NCIH358 LUNG  |       |  |
| NCIH441 LUNG  |       |  |
| NCIH226 LUNG  |       |  |
| NCIH460 LUNG  |       |  |
| NCIH647 LUNG  |       |  |
| SKMES1 LUNG   |       |  |
| LK2 LUNG      |       |  |
| ABC1 LUNG     |       |  |
| NCIH2170 LUNG |       |  |
| NCIH23 LUNG   |       |  |
| RERFLCMS LUNG |       |  |
| SKLU1 LUNG    |       |  |
| DMS114 LUNG   |       |  |
| NCIH522 LUNG  |       |  |
| SBC5 LUNG     |       |  |
| VMRCLCD LUNG  |       |  |
|               | CCL17 |  |
|               | CXCL3 |  |
